# Supplementary material
Source: publisher site journal article supplement (https://www.dovepress.com/article/364540)
Supplement: Supplementary file 1 [file get_supplementary_file.php]

Supplementary Table (a): Distribution of medical students according to severity of depression during COVID-19 based on sociodemographic variables

| **Variables** | | **Total**  **(n=864)**  **n (%)** | **PHQ-9** | | | | |
| --- | --- | --- | --- | --- | --- | --- | --- |
| **None**  **n=268** | **Mild**  **n=244** | **Moderate**  **n=192** | **Moderately Severe**  **n=80** | **Severe**  **n=80** |
| Gender | Male | 498 (57.6) | 173 | 147 | 100 | 48 | 30 |
| Female | 366 (42.4) | 95 | 97 | 92 | 32 | 50 |
| Relationship status | Single | 827 (95.7) | 258 | 229 | 180 | 80 | 80 |
| Married/Engaged | 37 (4.3) | 10 | 15 | 12 | 0 | 0 |
| Year of study | First year | 551 (63.8) | 191 | 150 | 110 | 46 | 54 |
| Second year | 146 (16.9) | 29 | 54 | 41 | 9 | 13 |
| Third year | 90 (10.4) | 21 | 22 | 26 | 17 | 4 |
| Fourth year | 40 (4.6) | 14 | 13 | 5 | 8 | 0 |
| Final year | 37 (4.3) | 13 | 5 | 10 | 0 | 9 |
| Socioeconomic status | Upper | 78 (9) | 38 | 24 | 4 | 4 | 8 |
| Middle | 734 (85) | 215 | 202 | 183 | 74 | 60 |
| Lower | 52 (6) | 15 | 18 | 5 | 2 | 12 |
| Residence | Urban | 491 (56.8) | 154 | 111 | 117 | 49 | 60 |
| Rural | 373 (43.2) | 114 | 133 | 75 | 31 | 20 |
| BMI (Kg/m2) | Underweight (<18.5) | 182 (21) | 66 | 49 | 36 | 20 | 11 |
| Normal (18.5-22.9) | 345 (40) | 101 | 98 | 79 | 34 | 33 |
| Overweight (23-24.9) | 131 (15.2) | 42 | 39 | 13 | 17 | 20 |
| Obese I (25-29.9) | 140 (16.2) | 50 | 38 | 41 | 1 | 10 |
| Obese II (≥30) | 66 (7.6) | 9 | 20 | 23 | 8 | 6 |
| History of comorbidity | Yes | 90 (10.4) | 6 | 26 | 26 | 12 | 20 |
| No | 774 (89.6) | 262 | 218 | 166 | 68 | 60 |
| Addiction | Yes | 148 (17.1) | 27 | 42 | 37 | 28 | 14 |
| No | 716 (82.9) | 241 | 202 | 155 | 52 | 66 |
| Anxiolytics/Antidepressants intake | Yes | 76 (8.8) | 5 | 10 | 12 | 30 | 19 |
| No | 788 (91.2) | 263 | 234 | 180 | 50 | 61 |

Supplementary Table (b): Distribution of medical students according to severity of depression during COVID-19 based on physical activity, dietary and sleep habits

| **Variables** | | **Total**  **(n=864)**  **n (%)** | **PHQ-9** | | | | |
| --- | --- | --- | --- | --- | --- | --- | --- |
| **None**  **n=268** | **Mild**  **n=244** | **Moderate**  **n=192** | **Moderately Severe**  **n=80** | **Severe**  **n=80** |
| *Physical activity/week | Inactive | 369 (42.7) | 90 | 92 | 103 | 44 | 40 |
| Irregularly active | 269 (31.1) | 95 | 97 | 36 | 20 | 21 |
| Minimal active | 145 (16.8) | 61 | 33 | 28 | 4 | 19 |
| Highly active | 81 (9.4) | 22 | 22 | 25 | 12 | 0 |
| *Fast food consumption/ week | No | 284 (32.9) | 103 | 92 | 46 | 27 | 16 |
| Less than 3 times | 480 (55.6) | 141 | 124 | 130 | 41 | 44 |
| 3 to 5 times | 72 (8.3) | 18 | 24 | 4 | 10 | 16 |
| Greater than 5 times | 28 (3.2) | 6 | 4 | 12 | 2 | 4 |
| *Soft drinks consumption/ week | No | 458 (53) | 156 | 133 | 92 | 32 | 45 |
| Less than 3 times | 282 (32.6) | 80 | 87 | 63 | 28 | 24 |
| 3 to 5 times | 78 (9.1) | 28 | 16 | 29 | 5 | 0 |
| Greater than 5 times | 46 (5.3) | 4 | 8 | 8 | 15 | 11 |
| *Number of meals/day | 1 time | 17 (2) | 5 | 1 | 9 | 1 | 1 |
| 2 times | 281 (32.5) | 79 | 53 | 86 | 38 | 25 |
| 3 times | 449 (52) | 145 | 144 | 89 | 29 | 42 |
| Greater than 3 times | 117 (13.5) | 39 | 46 | 8 | 12 | 12 |
| *T.V/ Social media apps use/ day | No | 42 (4.8) | 14 | 9 | 5 | 5 | 9 |
| Less than 2 hours | 182 (21.1) | 86 | 57 | 28 | 9 | 2 |
| 2 to 4 hours | 362 (41.9) | 130 | 117 | 69 | 37 | 9 |
| Greater than 4 hours | 278 (32.2) | 38 | 61 | 90 | 29 | 60 |
| Sleep duration/ day | Less than 6 hours | 149 (17.2) | 25 | 49 | 29 | 37 | 9 |
| 6 to 8 hours | 570 (66) | 220 | 167 | 118 | 23 | 42 |
| Greater than 8 hours | 145 (16.8) | 23 | 28 | 45 | 20 | 29 |
| Time spent in bed before sleeping | Less than 1 hour | 450 (52.1) | 193 | 129 | 75 | 38 | 15 |
| 1 to 2 hours | 297 (34.4) | 65 | 93 | 85 | 29 | 25 |
| Greater than 2 hours | 117 (13.5) | 10 | 22 | 32 | 13 | 40 |
| Sleep medications use | Never | 782 (90.5) | 266 | 226 | 170 | 62 | 58 |
| Rarely | 69 (8) | 1 | 16 | 18 | 17 | 17 |
| Often | 13 (1.5) | 1 | 2 | 4 | 1 | 5 |

*In final analysis categories were merged and finalized into three categories due to less number of participants in any one category of specified variable.
